# Supplementary material
Source: publisher site journal article supplement (https://www.jstage.jst.go.jp/article/geochemj/50/6/50_2.0419/_supplement/_download/50_2.0419_1.pdf)
Supplement: Supplementary file 1 [file 50_2.0419_1.pdf]

Supplementary Material

Machida et al. (2016), Geology and geochemistry of ferromanganese nodules in the Japanese Exclusive Economic Zone around Minamitorishima Island

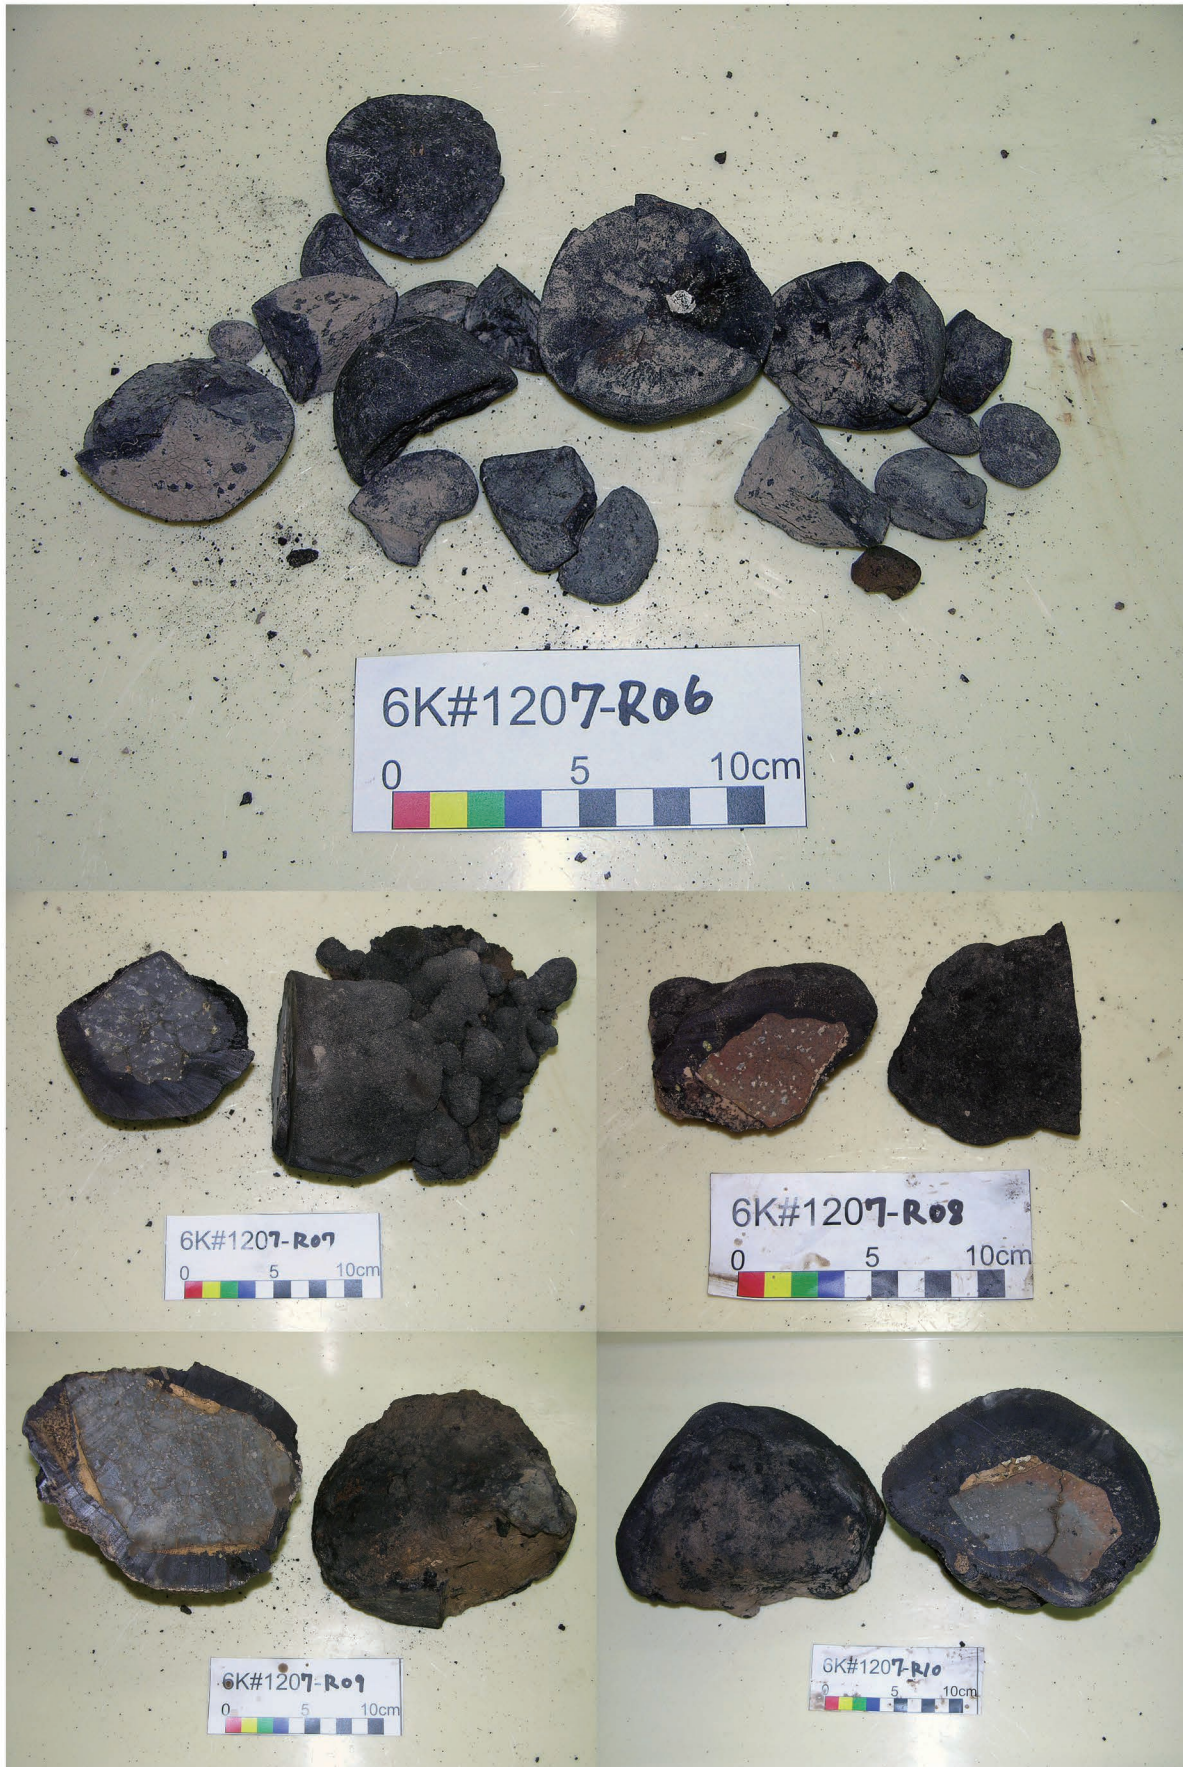

Fig. S1. Photographs of samples R06 (nodules), and R07, R08, R09, and R10 (crusts) collected from Site 6K 1207.
